# Supplementary material for: Evaluation of thyroid antibodies and benign disease prevalence among young adults exposed to 131I more than 25 years after the accident at the Chernobyl Nuclear Power Plant
Source: PeerJ. 2016 Mar 15;4:e1774. doi: 10.7717/peerj.1774 (PMC4806629; doi:10.7717/peerj.1774)
Supplement: Supplemental Information 1 — Data set of the study. [file peerj-04-1774-s001.xlsx]

## Sheet: Sheet1
Group	Sex (Female 1, Male 2)	Age	Weight	TGAb (IU/ml)	TGAb positive (Yes1, No 0)	TPOAb ( IU/ml)	TPOAb positive (Yes1, No 0)	TGAb or/and TPOAb positive (Yes 1, No 0)	FreeT3 (ng/ml)	FreeT4 (ng/ml)	TSH (µIU/ml)	Cs-137 (bq/body)	Thyroid volime (ml)	Nodule (Yes 1, No 0)	Goiter (Yes 1, No 0)
1	2	29	73	0.23	0	12.44	0	0	1.8	1.29	0.43	0	16.655	0	0
1	2	30	77	1.04	0	1.6	0	0	1.7	1.501	0.74	0	18.054	1	0
1	1	26	80	0.9	0	1.47	0	0	2.38	0.989	1.39	0	24.321	0	1
1	2	27	91	0.17	0	0.56	0	0	1.65	1.662	1.93	0	17.459	0	0
1	1	27	78	0.63	0	3.3	0	0	1.11	1.003	1.25	0	12.874	0	0
1	2	30	60	0.23	0	8.29	0	0	1.46	0.001	1	0	18.233	1	0
1	1	29	60	3.62	0	3.25	0	0	1.26	1.537	2.3	0	10.341	0	0
1	1	27	62	0.62	0	5.73	0	0	1.8	1.343	3.35	0	15.505	0	0
1	1	28	53	1.79	0	1.68	0	0	1.18	1.487	1.21	0	12.726	1	0
1	1	27	59	0.36	0	1.12	0	0	1.71	0.972	1.77	0	17.24	0	0
1	1	28	57	2.57	0	2.72	0	0	1.79	1.37	4.55	0	18.247	0	1
1	1	29	55	0.2	0	1.16	0	0	1.43	0.001	1.33	0	11.93	0	0
1	2	27	89	0.46	0	1.68	0	0	1.42	0.001	0.82	0	16.693	0	0
1	2	27	103	0.14	0	0.33	0	0	1.86	1.366	0.93	0	27.013	0	1
1	1	29	82	15.34	1	50.84	1	1	1.09	1.437	2.49	0	16.25	0	0
1	2	30	58	1.4	0	0.89	0	0	2.54	1.06	0.81	0	14.389	0	0
1	1	27	46	7.13	0	1.67	0	0	1.34	0.001	1.11	0	14.586	0	0
1	2	28	94	8.28	1	508.7	1	1	2.79	1.562	0.01	0	31.324	0	1
1	1	28	70	1.16	0	19.38	0	0	1.67	1.381	0.48	0	21.749	0	1
1	1	26	70	1.6	0	449.7	1	1	3.04	0.944	5.19	0	17.963	1	0
1	1	29	68	0.37	0	0.85	0	0	1.75	1.596	0.89	0	15.063	0	0
1	1	27	49	0.39	0	1.64	0	0	1.44	1.232	0.8	0	13.45	0	0
1	1	27	47	0.55	0	2.01	0	0	1.51	0.001	1.42	0	10.211	0	0
1	1	28	55	0.53	0	0.69	0	0	1.63	1.409	0.35	0	17.503	0	0
1	1	26	75	1.66	0	416.8	1	1	2.1	0.899	4.89	0	12.693	1	0
1	1	28	54	9.62	1	5.73	0	1	1.03	1.248	0.96	0	10.852	0	0
1	1	29	70	0.29	0	1.03	0	0	1.64	1.233	1.24	0	11.666	0	0
1	2	28	71	0.4	0	0.85	0	0	1.62	1.437	0.4	0	13.865	0	0
1	1	30	62	1.52	0	0.87	0	0	1.43	1.467	0.49	0	36.247	1	1
1	1	27	39	0.34	0	0.48	0	0	1.45	1.712	0.87	0	12.177	0	0
1	2	27	93	0.09	0	0.87	0	0	1.69	1.652	0.31	0	14.583	0	0
1	1	29	57	0.32	0	0.72	0	0	1.57	1.014	0.7	0	14.953	0	0
1	1	27	56	0.76	0	0.59	0	0	1.5	0.001	0.9	0	10.286	0	0
1	1	30	100	0.39	0	0.6	0	0	1.51	1.226	1.53	0	8.99	0	0
1	1	26	72	0.51	0	1.33	0	0	2.32	1.3	0.29	0	21.703	0	1
1	1	29	102	0.12	0	0.29	0	0	1.96	1.285	1.14	0	18.568	0	1
1	1	28	58	0.04	0	0.99	0	0	1.71	1.424	1.6	0	14.425	0	0
1	1	27	53	2.3	0	9.07	0	0	1.6	1.066	0.88	0	11.571	0	0
1	1	27	56	0.61	0	2.16	0	0	2.12	0.001	3.34	0	9.221	0	0
1	1	27	53	0.55	0	1.61	0	0	2.01	0.001	0.6	0	21.986	1	1
1	1	28	52	1.66	0	0.55	0	0	1.33	0.851	2.1	0	19.428	1	1
1	2	30	85	0.87	0	2.99	0	0	1.23	1.002	0.7	0	37.991	0	1
1	1	27	73	2.75	0	841	1	1	1.6	0.924	9.57	0	21.795	0	1
1	1	29	59	0.53	0	1.08	0	0	1.38	1.303	2.32	0	8.736	0	0
1	1	26	70	0.36	0	0.93	0	0	1.76	1.337	0.9	0	9.181	0	0
1	1	26	79	0.21	0	0.05	0	0	2.22	0.613	1.03	0	25.728	0	1
1	2	26	75	0.23	0	0.13	0	0	1.88	1.239	1.46	346	18.83	0	0
1	1	30	65	0.66	0	0.04	0	0	1.44	1.619	1.2	0	21.484	0	1
1	1	30	83	0.86	0	0.25	0	0	2.01	1.424	3.32	228	6.451	0	0
1	1	28	65	19.17	1	802.7	1	1	1.65	0.344	4.03	2278	22.758	1	1
1	1	29	61	1.85	0	313.1	1	1	1.49	1.434	1.17	2879	9.772	0	0
1	1	27	90	1.87	0	4.94	0	0	1.85	1.31	0.98	0	13.728	1	0
1	2	27	93	2.44	0	1.36	0	0	1.8	1.428	1.39	4471	21.089	0	0
1	1	27	81	3.37	0	6.33	0	0	1.39	1.006	3.18	0	12.92	0	0
1	1	28	109	4.19	0	6.79	0	0	1.71	1.559	1.32	0	16.836	1	0
1	1	28	57	2.6	0	1.57	0	0	1.44	1.266	0.91	0	8.228	1	0
1	1	28	48	0.58	0	2	0	0	1.65	1.046	0.75	227	9.432	0	0
1	1	27	75	201	1	363.6	1	1	0.82	1.124	1.76	0	8.26	0	0
1	1	28	51	1.16	0	0.85	0	0	1.33	1.105	1.53	0	14.652	1	0
1	2	26	64	1.83	0	5.57	0	0	1.64	1.398	0.69	0	22.714	0	0
1	1	24	49	1.37	0	6.46	0	0	1.3	1.338	1.2	0	9.053	0	0
1	2	27	68	0.48	0	1.33	0	0	1.09	1.347	1.58	0	12.12	0	0
1	2	27	75	0.44	0	1.13	0	0	1.27	1.325	1.75	0	26.905	0	1
1	1	27	59	256.8	1	557.8	1	1	1.52	1.273	1.63	0	19.131	0	1
1	2	27	94	1.83	0	6.85	0	0	1.3	1.221	0.85	0	14.358	0	0
1	2	28	99	2.85	0	1.52	0	0	1.37	1.242	0.77	0	27.623	0	1
1	1	26	64	131.6	1	520.1	1	1	1.7	0.906	7.05	0	15.44	0	0
1	1	28	76	0.81	0	1.65	0	0	1.99	1.167	0.85	0	13.067	0	0
1	2	26	97	0.9	0	2.39	0	0	1.56	1.532	0.23	0	30.538	0	1
1	1	26	79	0.56	0	2.39	0	0	1.27	1.323	0.46	0	24.168	0	1
1	1	26	61	1.41	0	1.78	0	0	1.11	1.624	0.83	0	12.094	0	0
1	1	28	95	1.19	0	7.34	0	0	1.27	1.416	0.61	0	25.622	1	1
1	2	28	83	0.84	0	4.31	0	0	1.25	1.528	1.32	0	35.013	0	1
1	1	26	89	1.19	0	0.56	0	0	1.24	1.234	1.96	0	19.135	0	1
1	1	27	57	0.48	0	0.89	0	0	1.27	1.352	0.89	0	17.669	0	0
1	1	28	54	211.7	1	450.8	1	1	1.44	1.326	0.92	0	12.91	0	0
1	1	27	50	0.54	0	0.41	0	0	0.54	0.949	0.85	0	11.631	0	0
1	1	29	72	16.46	1	0.74	0	1	0.14	1.158	0.6	0	21.612	0	1
1	1	28	69	1.6	0	0.01	0	0	2.43	1.063	0.56	0	30.993	0	1
1	1	30	73	0.58	0	0.48	0	0	2.67	1.059	1.87	0	9.348	1	0
1	1	28	59	1.49	0	0.75	0	0	1.47	0.836	0.83	0	6.947	0	0
1	1	27	72	2.55	0	2.56	0	0	0.07	1.273	2.13	0	16.028	0	0
1	2	27	84	0.45	0	0.56	0	0	1.95	1.161	1.42	1387	17.937	0	0
1	1	28	59	0.7	0	0.69	0	0	2.34	1.452	1.03	0	8.568	0	0
1	2	30	80	7.8	0	110.1	1	1	2.43	0.934	4.25	0	13.618	0	0
1	1	27	81	198.2	1	178.7	1	1	2.91	0.978	13.56	0	26.556	0	1
1	1	27	47	5.63	0	0.05	0	0	1.64	1.098	0.9	0	17.322	1	0
1	1	30	62	4.79	0	30.65	1	1	2.49	0.968	1.78	0	16.161	1	0
1	1	30	55	173.6	1	6.74	0	1	1.76	0.863	1.85	0	30.02	0	1
1	1	29	83	0.56	0	0.32	0	0	1.78	0.93	1.59	0	22.879	0	1
1	1	29	60	1.14	0	1.36	0	0	1.55	1.105	1.27	0	12.777	0	0
1	1	27	60	2.65	0	1.73	0	0	2.23	0.981	1.17	0	15.133	0	0
1	1	29	46	0.42	0	0.45	0	0	1.77	0.838	0.63	0	9.25	1	0
1	2	28	100	4.98	0	0.98	0	0	2.21	1.401	0.81	1420	13.566	0	0
1	1	28	76	3.37	0	0.69	0	0	2.59	0.969	1.07	0	9.176	0	0
1	1	27	39	136.7	1	60.84	1	1	4.4	1.926	0.06	1079	9.552	0	0
1	1	30	64	1.1	0	0.32	0	0	2.26	0.933	0.99	1707	17.201	0	0
1	1	27	70	2.39	0	0.17	0	0	1.38	0.855	1.42	0	12.563	0	0
1	2	28	94	0.33	0	0.5	0	0	2.49	1.269	1.78	0	12.452	0	0
1	2	30	85	0.81	0	0.3	0	0	2.59	1.565	2.19	0	18.123	0	0
1	1	28	53	0.08	0	7.06	0	0	2.96	1.45	0.75	1312	12.457	1	0
1	1	28	87	0.48	0	0.3	0	0	2.79	1.298	1.08	0	15.244	1	0
1	1	29	65	4.43	0	0.05	0	0	3.07	1.375	0.71	0	18.233	0	1
1	1	29	73	1.03	0	1.26	0	0	2.58	1.524	0.94	0	15.678	0	0
1	1	27	79	1.21	0	2.6	0	0	3.28	1.43	0.76	0	22.757	0	1
1	1	28	96	5.45	0	16.63	0	0	3.3	1.036	3.44	0	17.661	0	0
1	2	27	71	0.96	0	2.87	0	0	2.59	1.266	1.33	0	17.165	0	0
1	1	28	62	16.87	1	0.95	0	1	3.45	1.158	1.36	0	19.112	0	1
1	2	27	79	2.29	0	0.19	0	0	3.11	1.487	1.73	0	20.894	0	0
1	1	27	52	4.29	0	4.45	0	0	2.97	1.311	0.43	889	11.12	0	0
1	1	26	75	1.7	0	204.1	1	1	1.94	0.49	23.5	0	14.175	0	0
1	1	29	52	0.23	0	1.85	0	0	3.22	2.326	0.01	0	13.044	0	0
1	1	30	57	8.46	1	1.19	0	1	1.32	1.205	2.13	0	10.468	0	0
1	1	30	105	1.24	0	2.31	0	0	3.88	1.3	0.54	0	13.696	0	0
1	1	30	61	343.8	1	696.1	1	1	3.57	0.764	10.68	2126	29.955	0	1
1	2	28	57	0.22	0	2.72	0	0	3.73	1.812	0.32	0	15.361	0	0
1	1	28	58	0.9	0	4.68	0	0	3.42	1.521	0.71	0	19.378	0	1
1	1	29	60	1.15	0	1.36	0	0	3.93	1.514	0.3	0	17.606	0	0
1	1	27	60	9.35	1	4.15	0	1	3.14	1.519	4.35	0	8.277	0	0
1	1	30	63	1.84	0	2.24	0	0	3.54	1.38	1.26	1788	12.956	0	0
1	2	30	62	1.38	0	1.85	0	0	3.6	1.51	1.08	0	19.667	0	0
1	1	29	75	1.36	0	1.51	0	0	1.27	1.524	1.05	0	12.847	0	0
1	1	27	62	136.9	0	101.2	1	1	3.61	1.548	2.82	3078	15.761	0	0
1	1	29	61	2.6	0	2.61	0	0	3.87	1.643	2.9	0	20.177	0	1
1	2	30	105	0.75	0	0.56	0	0	3.64	1.613	1.71	0	16.692	1	0
1	1	27	54	2.52	0	4.78	0	0	3.72	1.433	0.63	0	23.18	0	1
1	1	29	53	0.93	0	1.91	0	0	3.55	1.748	0.69	0	14.404	0	0
1	1	29	58	9	1	556.2	1	1	3.46	1.927	0.01	0	12.695	1	0
1	1	28	85	81.11	1	481.5	1	1	3.35	1.511	1.89	0	23.619	0	1
1	1	30	58	5.83	0	14.79	0	0	3.43	1.385	0.79	0	11.827	0	0
1	1	30	60	1.25	0	8.58	0	0	4.23	1.748	0.81	0	15.864	0	0
1	1	26	63	11.3	1	45.98	1	1	4.28	1.365	0.85	0	14.949	0	0
1	1	29	55	1.15	0	0.59	0	0	3.17	1.617	1.58	0	8.732	0	0
1	1	29	68	255.9	1	273.6	1	1	3.14	1.759	2.28	0	30.451	1	1
1	1	28	63	2.07	0	299.4	1	1	3.8	1.542	1.18	238	9.455	1	0
1	1	28	71	12.81	1	608.2	1	1	3.77	1.5	2.73	0	9.082	0	0
1	1	28	65	3.7	0	7.08	0	0	2.04	1.496	0.55	1604	21.342	0	1
1	1	29	63	1.23	0	1.41	0	0	2.59	1.167	0.9	0	11.634	0	0
1	1	30	71	0.15	0	2.59	0	0	2.79	1.21	2.7	222	9.066	0	0
1	1	27	65	0.95	0	3.48	0	0	2.37	1.354	1.25	0	15.244	0	0
1	1	28	90	1.69	0	9.67	0	0	3.88	1.812	0.52	0	24.252	0	1
1	1	26	63	5.95	0	2.21	0	0	2.67	1.256	1.85	0	22.197	0	1
1	1	30	69	1.83	0	2.05	0	0	2.74	1.377	1.05	0	16.123	1	0
1	1	27	52	1.46	0	424.7	1	1	2.71	1.572	3.1	1120	10.843	0	0
1	1	30	72	0.96	0	4.87	0	0	2.31	1.474	1.75	0	12.463	1	0
1	1	29	56	2.66	0	3.26	0	0	3.6	1.554	2.28	988	20.222	0	1
1	1	26	73	1.08	0	3.06	0	0	3.01	1.231	1.69	0	22.834	0	1
1	1	28	50	1.28	0	7.47	0	0	3.22	1.595	0.91	1705	21.375	0	1
1	1	30	72	9.2	1	0.24	0	1	2.78	1.575	0.84	225	19.744	0	1
1	1	26	65	0.35	0	1.89	0	0	2.55	1.271	0.58	0	21.948	0	1
1	1	28	51	0.84	0	1.77	0	0	2.93	1.276	0.83	0	32.042	1	1
1	1	30	89	0.97	0	0.98	0	0	2.91	1.173	0.52	0	14.485	1	0
1	1	29	62	0.87	0	0.38	0	0	2.88	1.13	2.76	0	9.605	0	0
1	1	30	64	0.7	0	1.67	0	0	2.65	1.43	0.59	2796	11.703	1	0
1	1	29	86	1.23	0	1.78	0	0	3.17	1.417	0.93	0	22.63	0	1
1	1	28	58	0.36	0	2.4	0	0	2.97	1.498	0.54	1923	28.205	0	1
1	1	27	59	5.12	0	6.09	0	0	2.33	1.515	2.85	0	10.507	0	0
1	1	28	52	0.82	0	0.05	0	0	2.77	1.666	1.93	0	27.625	0	1
1	2	27	71	1.71	0	2.6	0	0	3.32	1.427	1.48	0	37.707	1	1
1	1	30	46	0.05	0	12.55	0	0	2.09	1.528	0.48	795	16.07	1	0
1	1	27	63	3.02	0	33.68	1	1	1.91	1.447	1.43	1347	18.279	0	1
1	1	28	73	0.31	0	2.42	0	0	2.21	1.545	0.67	0	21.804	1	1
1	2	29	108	4.39	0	2.69	0	0	2.7	1.375	1.98	0	26.408	0	1
1	1	27	56	0.49	0	0.34	0	0	3.09	1.167	0.82	0	13.843	0	0
1	1	26	77	0.9	0	6.82	0	0	2.09	1.445	1.67	0	11.996	1	0
1	1	27	58	0.44	0	2.77	0	0	2.1	1.421	1.08	0	15.916	0	0
1	1	26	66	63.4	1	535.1	1	1	4.48	2.504	0.04	0	21.603	0	1
1	1	28	86	2.71	0	429.6	1	1	3.44	1.259	14.92	0	12.278	0	0
1	1	30	50	14.69	1	12.24	0	1	2.71	1.457	1.21	953	12.523	0	0
1	2	28	93	1.5	0	10.29	0	0	2.37	1.572	1.95	1437	18.054	0	0
1	1	27	101	3.58	0	505.5	1	1	3.33	1.483	7.43	228	12.467	0	0
1	1	30	73	0.53	0	1.55	0	0	2.88	1.387	1.15	0	12.155	0	0
1	1	26	69	3.14	0	2.2	0	0	4.2	1.464	2.01	0	13.097	0	0
1	2	27	98	3.44	0	290.3	1	1	3.42	1.327	2.94	0	14.554	0	0
1	1	29	68	201.5	1	492.1	1	1	5.4	2.637	0.01	0	33.977	0	1
1	2	26	65	7.4	0	478.1	1	1	2.61	1.468	0.87	0	12.731	0	0
1	1	29	99	1.29	0	0.73	0	0	3.52	1.325	1.22	0	18.736	0	1
1	1	30	50	0.69	0	2.96	0	0	3.34	1.091	0.84	2367	19.007	0	1
1	1	28	54	0.84	0	7.4	0	0	2.79	1.406	1.53	0	14.692	0	0
1	1	29	67	0.41	0	6.63	0	0	4.28	1.599	1.8	0	17.097	0	0
1	1	30	70	5.22	0	15.73	0	0	2.91	1.298	0.88	0	18.743	1	1
1	1	29	47	0.96	0	2.69	0	0	2.99	1.651	0.42	0	20.128	0	1
1	2	29	97	2.32	0	5.6	0	0	3.38	1.449	1.64	0	22.739	0	0
1	1	30	69	5.58	0	12.19	0	0	3.27	1.734	1.95	0	19.094	0	1
1	1	31	62	1.82	0	16.87	0	0	2.66	1.321	1.13	0	16.296	0	0
1	2	28	72	0.21	0	2.07	0	0	2.95	1.554	1.74	2461	10.461	0	0
1	2	27	81	0.86	0	7.38	0	0	2.81	1.61	1.65	1982	23.94	0	0
1	1	28	64	318.9	1	489.1	1	1	3.69	1.336	6.32	0	22.703	0	1
1	1	27	61	0.42	0	2.83	0	0	1.94	1.324	3	0	14.395	0	0
1	1	27	46	0.57	0	28.29	0	0	2.69	1.446	2.18	0	22.499	0	1
1	1	30	71	0.88	0	2.13	0	0	4.44	1.573	0.65	0	5.679	0	0
1	1	28	57	16.8	1	2.42	0	1	2.88	1.538	0.29	0	19.869	0	1
1	1	29	50	0.3	0	1.28	0	0	2.81	1.593	1.68	0	9.837	0	0
1	1	28	87	90.45	1	139.1	1	1	3.22	1.741	1.36	0	18.792	0	1
1	1	27	48	0.5	0	4.05	0	0	3.63	1.45	0.9	0	10.855	0	0
1	1	28	60	102.4	1	477.8	1	1	2.75	1.44	0.7	0	25.064	0	1
1	1	27	50	6.65	0	67.15	1	1	2.94	1.655	1.52	0	11.476	0	0
1	1	27	66	0.76	0	5.67	0	0	2.7	0.988	0.71	0	11.051	0	0
1	1	29	58	3.04	0	9.04	0	0	3.02	1.155	1.4	0	11.234	0	0
1	1	27	85	2.23	0	22.04	0	0	2.63	1.25	0.88	0	25.602	0	1
1	2	26	83	1.25	0	7.41	0	0	2.95	1.519	0.83	0	18.02	0	0
1	1	30	60	2.59	0	4.95	0	0	3.16	1.246	2.1	0	13.397	1	0
1	1	29	68	13.61	1	4.04	0	1	2.21	1.112	3.79	0	8.72	0	0
1	2	28	96	2.3	0	6.35	0	0	3.06	1.426	0.59	3245	22.924	0	0
1	1	29	59	2.75	0	4.59	0	0	3.01	1.258	1.05	0	17.589	1	0
1	2	28	84	1.7	0	1.99	0	0	3.07	1.334	1.53	1323	12.306	0	0
1	1	26	62	5.92	0	22.46	0	0	3.45	2.139	0.02	0	17.84	0	0
1	1	29	56	6.74	0	0.5	0	0	3.34	1.296	1.24	0	13.46	1	0
1	1	30	47	0.35	0	1.07	0	0	3.48	1.286	1	0	16.637	0	0
1	1	27	87	2.42	0	32.27	1	1	3.64	1.365	0.46	1412	23.387	0	1
1	1	27	127	0.41	0	2.4	0	0	3.75	1.258	0.65	1649	29.121	0	1
1	1	27	56	176.7	1	416.2	1	1	2.47	1.52	0.31	985	15.389	0	0
1	1	29	68	0.04	0	3.15	0	0	3.31	1.432	0.42	0	10.76	0	0
1	2	29	89	0.21	0	0.71	0	0	3.5	1.71	1.04	0	15.244	0	0
1	2	29	89	0.28	0	0.92	0	0	3.25	1.313	1.01	0	22.609	0	0
1	1	27	60	0.31	0	0.36	0	0	2.43	1.342	0.9	0	7.021	0	0
1	1	29	75	0.66	0	0.19	0	0	3.05	1.197	0.85	0	15.531	0	0
1	2	27	63	0.35	0	0.1	0	0	3.96	1.662	0.61	1694	16.442	0	0
1	1	27	77	0.67	0	0.31	0	0	4.12	1.389	1.95	3261	19.895	0	1
1	1	26	66	1.6	0	1.03	0	0	3.25	1.448	1.19	0	15.403	0	0
1	1	29	150	0.95	0	9.87	0	0	3.46	1.442	1.35	0	32.069	0	1
1	1	27	54	13.82	1	122.6	1	1	3.56	1.355	1.08	938	14.606	0	0
1	1	30	80	1.31	0	1.41	0	0	3.15	1.148	1.6	0	11.588	1	0
1	2	28	100	0.44	0	4.55	0	0	3.65	1.495	0.79	0	23.94	0	0
1	1	26	77	1.04	0	0.75	0	0	3.54	1.525	2.25	1900	20.267	0	1
1	1	29	46	1.65	0	3.81	0	0	3.02	1.485	1.22	882	14.707	0	0
1	2	28	65	0.31	0	0.05	0	0	3	1.26	0.7	1081	15.932	0	0
1	2	27	59	1.26	0	0.17	0	0	3.43	1.201	1.31	2452	11.524	0	0
1	1	30	60	2.45	0	1.16	0	0	5.32	1.865	0.03	0	33.667	1	1
1	1	25	56	3.22	0	0.02	0	0	3.44	1.199	1.02	0	12.901	0	0
1	1	26	65	3.25	0	3.15	0	0	2.87	1.094	0.17	1203	21.224	0	1
1	2	30	78	2.29	0	0.13	0	0	3.73	1.618	0.6	2263	24.775	0	0
1	1	28	80	2.29	0	0.07	0	0	2.71	1.387	0.3	0	29.185	1	1
1	1	27	59	68.84	1	29.77	0	1	3.44	1.271	1.82	2404	17.261	0	0
1	1	30	54	0.69	0	0.56	0	0	3.1	1.035	1.46	1319	11.557	0	0
1	1	30	82	0.03	0	1.08	0	0	3.55	1.249	1.02	0	13.443	0	0
1	2	31	72	0.19	0	30.03	1	1	3.83	1.298	1.57	0	20.508	1	0
1	1	29	55	0.03	0	1.33	0	0	3.03	1.322	1.4	0	12.345	1	0
1	2	29	74	0.21	0	0.61	0	0	4.34	1.281	1.31	0	12.977	0	0
1	1	29	64	0.06	0	1.75	0	0	2.92	1.032	1.05	0	16.218	1	0
1	2	27	100	0.33	0	2.02	0	0	0.85	0.8	0.96	0	12.052	0	0
1	1	30	64	2	0	56.55	1	1	2.85	1.51	2.05	1432	12.761	0	0
1	1	27	54	2.19	0	11.15	0	0	2.87	1.218	2.83	0	8.001	0	0
1	2	27	95	0.79	0	18.79	0	0	2.37	1.821	0.89	0	13.573	0	0
1	2	30	102	1.98	0	2.66	0	0	2.34	1.44	0.58	0	11.829	0	0
1	1	28	56	0.81	0	1.44	0	0	2.41	1.706	1.81	0	5.988	0	0
1	1	29	40	1.43	0	2.65	0	0	2.59	1.427	0.61	735	8.519	0	0
1	1	31	73	0.77	0	2.56	0	0	1.41	0.765	0.91	0	13.419	0	0
1	2	30	75	0.32	0	2.03	0	0	1.37	0.517	0.42	0	17.55	0	0
1	2	30	60	0.98	0	0.5	0	0	2.45	1.323	0.87	0	7.891	0	0
1	1	28	45	0.45	0	79.08	1	1	2.25	1.418	1.56	0	5.206	0	0
1	1	31	49	4.94	0	1.28	0	0	2.39	1.133	1.06	1572	7.664	0	0
1	1	29	61	2.17	0	405.24	1	1	2.67	1.035	2.25	0	8.53	0	0
1	1	30	56	0.67	0	2.57	0	0	2.56	0.994	0.91	0	9.647	1	0
1	1	30	87	0.67	0	3.86	0	0	2.15	1.125	0.97	0	6.116	0	0
1	1	29	62	3.15	0	438.55	1	1	2.53	0.836	9.62	0	6.346	0	0
1	1	28	50	0.78	0	21.49	0	0	2.69	1.307	1.29	0	7.817	0	0
1	1	28	40	1.82	0	1.95	0	0	2.77	1.243	1.97	0	7.07	1	0
1	2	31	93	1.15	0	4.85	0	0	3.15	1.635	1.19	0	12.059	0	0
1	1	28	72	1.58	0	2.15	0	0	3.3	1.62	0.99	0	10.907	1	0
1	1	29	54	1.23	0	1.39	0	0	3.14	1.664	1.12	0	9.101	0	0
1	2	29	58	4.69	0	2.8	0	0	2.32	1.482	0.18	236	9.829	0	0
1	1	30	46	1.17	0	3.7	0	0	5.11	2.253	0.03	0	13.036	0	0
1	1	31	50	1.45	0	1.85	0	0	3.18	1.565	1.64	0	4.345	0	0
1	1	27	64	1.2	0	254.89	1	1	1.79	1.513	2.12	0	6.208	0	0
1	1	30	60	10.87	0	156.25	1	1	2.55	1.307	2.1	222	11.065	0	0
1	2	28	72	0.91	0	5.91	0	0	2.44	1.905	0.44	0	12.956	0	0
1	1	27	61	232.69	1	492.93	1	1	9.43	3.932	0.06	0	13.91	0	0
1	1	30	48	2.27	0	3.92	0	0	2.61	1.425	1.28	0	6.143	0	0
1	1	30	89	1.33	0	5.24	0	0	2.51	1.264	0.73	1947	9.772	0	0
1	1	30	51	1.72	0	1.7	0	0	2.42	1.425	1.15	926	4.902	0	0
1	1	30	56	1.34	0	40.02	1	1	3.32	1.591	0.98	0	10.622	0	0
1	1	29	89	2.02	0	1.34	0	0	3.2	1.546	2.14	0	13.088	0	0
1	1	30	62	0.85	0	1.72	0	0	3.67	1.423	1.24	0	6.76	1	0
1	1	31	67	1.8	0	1.75	0	0	3.09	1.695	0.95	0	8.306	0	0
1	2	28	93	6.61	0	390.71	1	1	3.21	1.456	5.86	0	14.542	0	0
1	1	29	61	2.13	0	9.28	0	0	2.81	1.543	0.57	0	6.698	0	0
1	1	28	48	1.24	0	51.71	1	1	2.78	1.561	1.13	0	7.204	0	0
1	1	29	50	4.86	0	4.76	0	0	4.11	2.015	1.25	0	7.817	0	0
1	1	30	90	3.48	0	3.14	0	0	3.07	1.264	0.95	0	11.513	1	0
1	1	29	53	0.78	0	2.47	0	0	3.01	1.74	0.78	1027	11.898	0	0
1	1	30	81	1.2	0	5.37	0	0	2.98	1.733	2.29	0	6.898	0	0
1	1	27	70	4.92	0	19.28	0	0	3.71	1.603	0.73	2115	11.065	0	0
1	1	29	72	4.03	0	1.29	0	0	3.15	1.328	0.88	0	14.416	0	0
1	1	27	50	3.11	0	2.5	0	0	2.5	1.321	0.76	0	11.678	0	0
1	1	31	46	9.11	1	688.73	1	1	2.39	1.375	3.24	233	4.674	0	0
1	1	30	85	3.61	0	18.68	0	0	2.87	1.324	1.88	0	9.811	0	0
1	2	30	120	1.16	0	1.06	0	0	3.42	1.49	1.31	3772	19.167	0	0
1	1	31	66	1.49	0	2.89	0	0	2.9	1.333	0.94	221	13.412	0	0
1	1	31	57	4.51	0	1.85	0	0	3.01	1.298	0.59	0	10.346	0	0
1	1	28	52	4.84	0	3.45	0	0	2.31	1.214	1.76	1032	6.416	0	0
1	2	31	106	4.44	0	7.37	0	0	4.11	0.809	0.91	203	19.4	0	0
1	1	29	53	5.3	0	4.64	0	0	3.18	1.171	1.52	1278	4.886	0	0
1	1	29	61	1.78	0	1.8	0	0	2.77	1.75	0.81	2597	10.053	0	0
1	1	31	58	5.85	0	5.43	0	0	2.55	1.186	1.25	0	11.729	0	0
1	1	29	60	2.73	0	1.88	0	0	2.42	0.987	0.44	2579	55.457	1	1
1	1	28	71	0.96	0	0.98	0	0	2.55	1.235	0.61	0	10.5	0	0
1	1	28	55	1.57	0	2.92	0	0	14.02	0.283	0.64	0	9.446	0	0
1	2	30	72	1.53	0	78.91	1	1	3.42	1.39	2.05	0	33.27	0	1
1	2	28	64	0.99	0	6.45	0	0	3.18	1.466	0.69	0	15.993	0	0
2	1	21	40	1.4	0	0.43	0	0	2.1	1.651	0.08	0	15.206	0	0
2	1	24	46	1.46	0	3.29	0	0	1.98	1.404	0.85	0	14.369	0	0
2	1	22	62	0.26	0	0.52	0	0	1.71	1.361	1.25	0	21.624	0	1
2	2	22	56	0.29	0	0.52	0	0	1.42	1.289	1.52	0	10.929	0	0
2	1	22	57	0.47	0	0.93	0	0	2.07	1.147	3.37	0	19.631	0	1
2	2	24	86	0.46	0	8	0	0	1.78	1.455	0.52	0	20.7	0	0
2	2	23	89	0.46	0	1.04	0	0	1.64	1.566	1.45	0	18.827	0	0
2	1	21	51	0.57	0	0.95	0	0	1.83	1.143	0.67	0	13.703	0	0
2	1	22	75	0.61	0	0.68	0	0	2.21	1.586	1.38	0	18.076	0	1
2	1	24	59	0.72	0	0.49	0	0	1.72	1.223	0.59	0	13.325	0	0
2	1	23	75	0.5	0	4.39	0	0	1.92	1.346	1.1	0	12.746	0	0
2	1	23	65	0.83	0	0.67	0	0	2.07	0.96	1.78	0	10.26	0	0
2	1	24	60	1.34	0	1.31	0	0	1.78	1.553	1.62	0	16.204	0	0
2	1	22	52	0.56	0	10.67	0	0	1.61	1.471	1.73	0	13.854	0	0
2	1	22	59	0.99	0	1.37	0	0	1.4	1.551	1.92	0	12.979	0	0
2	1	21	60	0.63	0	0.71	0	0	1.6	1.066	0.51	0	14.514	0	0
2	1	25	63	0.55	0	7.47	0	0	0.52	1.088	0.87	0	14.78	0	0
2	1	24	84	0.33	0	2.37	0	0	2.03	1.302	0.41	0	19.76	0	1
2	1	24	48	0.62	0	0.59	0	0	1.33	1.529	1.21	0	7.935	0	0
2	1	23	55	1.57	0	1.52	0	0	1.21	0.001	0.92	0	15.947	0	0
2	1	24	55	24.54	1	5.81	0	1	1.73	1.324	1.74	0	15.732	0	0
2	1	21	92	1.62	0	1.32	0	0	2.4	0.922	1.34	0	23.713	0	1
2	1	24	80	0.91	0	1.64	0	0	1.85	1.589	1.11	0	19.994	0	1
2	1	24	59	0.38	0	0.93	0	0	1.04	0.963	0.82	0	14.115	0	0
2	2	22	92	0.18	0	0.72	0	0	1.82	1.534	0.83	0	23.784	0	0
2	1	22	77	2.42	0	1.68	0	0	2.65	1.453	0.91	0	14.47	0	0
2	1	20	47	0.63	0	2.47	0	0	1.7	1.723	1.78	939	7.528	0	0
2	1	24	78	0.32	0	0.87	0	0	2.17	1.079	0.29	0	24.412	0	1
2	1	22	52	1.06	0	49.08	1	1	1.84	1.444	1.2	0	12.232	0	0
2	1	21	50	0.52	0	3.62	0	0	1.8	0.001	0.35	0	9.421	0	0
2	1	24	54	73.22	1	210.2	1	1	1.69	1.277	1.3	0	14.768	0	0
2	1	22	74	3.95	0	24.07	0	0	1.67	1.308	0.78	0	17.399	0	0
2	2	22	95	1.31	0	1.27	0	0	1.73	1.162	1.3	0	14.951	0	0
2	1	21	58	1.48	0	13.29	0	0	1.61	0.001	0.62	0	13.55	0	0
2	1	24	81	1.02	0	1.67	0	0	2.14	0.959	0.55	0	18.296	0	1
2	2	21	79	0.43	0	0.7	0	0	1.51	1.346	0.7	0	14.332	0	0
2	1	20	74	6.32	0	1.42	0	0	1.75	1.187	1.09	1234	11.029	0	0
2	1	23	58	2.37	0	1.21	0	0	1.57	1.465	1.58	0	24.564	0	1
2	1	20	72	0.33	0	33.25	1	1	2.22	0.87	1.62	0	21.965	0	1
2	1	21	66	3.45	0	12.38	0	0	1.79	1.43	0.02	0	11.097	1	0
2	2	24	91	5.47	0	837.1	1	1	1.46	1.374	6.55	1952	27.935	0	1
2	1	23	59	4.66	0	271.6	1	1	1.82	0.001	0.89	4044	8.612	0	0
2	2	22	83	0.93	0	5.4	0	0	1.91	1.715	1.23	1522	14.706	0	0
2	1	20	65	0.69	0	1.86	0	0	1.64	1.799	1.45	224	12.899	0	0
2	1	21	65	0.26	0	5.63	0	0	2.41	0.001	0.92	214	8.842	0	0
2	1	21	52	3.2	0	3.58	0	0	2.42	0.778	1.65	0	20.731	0	1
2	1	20	51	0.57	0	3.22	0	0	1.45	1.441	1.01	0	9.448	0	0
2	1	24	110	1.24	0	11.21	0	0	1.69	1.345	2.3	0	9.94	0	0
2	2	21	83	0.78	0	2.03	0	0	1.55	1.524	0.4	219	19.613	0	0
2	1	23	54	0.86	0	15.83	0	0	1.32	1.824	0.75	1001	10.778	0	0
2	1	21	75	19.51	1	3.71	0	1	1.11	1.723	2.81	221	20.259	0	1
2	1	23	63	2.86	0	5.64	0	0	1.41	1.587	0.72	210	14.969	0	0
2	1	22	56	5.99	0	4	0	0	1.87	0.485	0.53	222	11.286	0	0
2	1	23	78	2.1	0	7.38	0	0	1.43	1.631	1	0	20.391	0	1
2	1	20	60	47.15	1	6.09	0	1	1.25	1.228	0.98	1182	11.726	0	0
2	1	24	71	10.4	1	43.08	1	1	1.23	1.327	1.77	1726	16.078	0	0
2	1	24	85	2.84	0	1.61	0	0	1.62	1.77	1.46	0	9.746	0	0
2	1	21	62	0.52	0	0.78	0	0	1.65	1.081	2.23	1117	11.899	1	0
2	2	22	54	0.6	0	2.19	0	0	1.33	1.251	2.14	0	8.294	0	0
2	1	22	48	0.82	0	19.02	0	0	1.75	1.566	0.81	0	10.983	0	0
2	1	22	54	14.37	1	410.7	1	1	1.37	1.294	1.44	0	13.671	0	0
2	2	21	78	0.47	0	1.22	0	0	1.47	1.38	1.22	0	18.279	0	0
2	1	23	51	0.65	0	1.22	0	0	1.29	1.575	0.55	0	18.218	0	1
2	1	24	47	0.85	0	1.5	0	0	1.63	1.379	2	0	10.153	0	0
2	2	23	64	0.41	0	1.85	0	0	0.96	1.305	1.82	0	9.384	0	0
2	2	22	95	0.34	0	0.63	0	0	1.26	1.26	0.48	0	27.564	0	1
2	2	21	66	2.45	0	2.32	0	0	2.21	1.384	0.67	0	17.707	0	0
2	1	22	48	1.49	0	0.34	0	0	1.53	1.081	2.61	0	14.542	1	0
2	1	24	45	0.84	0	1.91	0	0	1.78	1.06	0.42	0	11.051	0	0
2	1	23	50	1.63	0	0.66	0	0	2.51	1.368	2.03	0	25.295	0	1
2	2	23	127	0.98	0	1.93	0	0	3.12	0.893	1.68	0	11.403	0	0
2	1	23	56	2.76	0	0.87	0	0	3.02	1.171	0.06	0	13.134	0	0
2	2	25	74	1.21	0	0.37	0	0	1.02	0.875	0.55	1682	23.402	1	0
2	1	20	56	26.9	1	1.17	0	1	1.82	1.33	0.19	0	19.819	1	1
2	1	23	68	4.67	0	1.3	0	0	2.93	1.374	2.74	0	14.566	0	0
2	1	23	53	2.04	0	3.81	0	0	1.85	1.478	1.66	0	11.256	1	0
2	1	25	88	1.21	0	1.01	0	0	2.17	1.261	1.17	0	12.464	0	0
2	1	22	61	1.95	0	0.37	0	0	2.08	1.153	1.2	1046	21.766	0	1
2	1	22	54	12.85	1	189.1	1	1	2.2	1.118	2.34	0	16.66	0	0
2	1	23	54	1.3	0	4.57	0	0	2.15	1.301	0.81	5107	19.486	0	1
2	1	23	51	8.19	1	3.28	0	1	1.67	1.183	0.95	0	22.331	0	1
2	1	24	50	1.66	0	1.43	0	0	1.95	1.281	1.49	0	17.739	0	0
2	1	22	68	0.28	0	1.07	0	0	3.01	1.22	2.08	0	11.318	0	0
2	1	24	59	1.46	0	0.44	0	0	3.64	1.646	0.01	0	19.194	0	1
2	1	22	55	1.02	0	0.68	0	0	2.83	1.257	1.74	0	11.151	0	0
2	1	24	66	57	1	0.49	0	1	3.96	1.179	1.26	0	6.599	0	0
2	1	22	45	0.66	0	0.46	0	0	2.98	1.608	1.08	0	8.369	0	0
2	1	22	77	0.09	0	0.27	0	0	3.78	1.214	1.27	0	12.072	0	0
2	1	25	69	4.4	0	7.78	0	0	3.47	1.383	1.18	0	15.23	0	0
2	1	25	54	4.25	0	8.32	0	0	2.13	1.399	1.54	0	14.217	0	0
2	1	24	57	24.22	1	15.19	0	1	3.74	1.616	1.56	0	12.364	1	0
2	1	21	57	0.78	0	1.78	0	0	3.88	1.551	1.61	0	9.634	0	0
2	1	24	59	0.46	0	1.48	0	0	3.7	1.351	1.14	0	16.928	0	0
2	1	21	49	48.9	1	101.6	1	1	10.64	3.268	0.01	0	20.163	0	1
2	1	23	50	1.41	0	3.03	0	0	3.74	1.796	1.02	0	10.96	0	0
2	1	22	70	1.73	0	0.93	0	0	1.98	1.392	1.01	0	9.415	1	0
2	1	24	76	1.75	0	2.93	0	0	2.29	1.392	1.36	0	13.68	0	0
2	1	23	55	0.57	0	0.66	0	0	3	1.206	2.91	0	11.656	0	0
2	1	22	93	0.16	0	12.79	0	0	3.71	1.542	1.6	3377	24.994	0	1
2	2	21	68	1.98	0	0.86	0	0	3.69	1.673	1.61	0	29.968	0	1
2	1	20	56	0.78	0	1.34	0	0	3.11	1.402	2.2	0	9.053	0	0
2	1	23	64	1.61	0	8.93	0	0	3.94	1.761	1.08	0	11.503	0	0
2	1	25	98	1.79	0	2.81	0	0	1.42	1.355	1.21	0	15.527	0	0
2	1	22	58	0.85	0	2.59	0	0	3.97	1.607	1.43	0	11.435	0	0
2	2	24	108	3.59	0	0.85	0	0	3.15	1.639	2.1	0	26.007	0	1
2	1	24	94	0.83	0	5.37	0	0	3.99	1.692	1.1	0	18.808	1	1
2	1	23	52	2.3	0	0.37	0	0	3.04	1.646	1.29	0	8.537	0	0
2	1	24	60	439.1	1	581.5	1	1	3.29	1.562	3.61	0	11.985	0	0
2	1	24	103	1.36	0	4.54	0	0	3.24	1.464	3.83	0	5.026	0	0
2	1	22	64	1.28	0	2.18	0	0	3.97	1.649	1.41	0	18.174	0	1
2	1	23	95	17.91	1	4.15	0	1	3.93	1.705	1.03	0	14.048	1	0
2	1	23	45	2.4	0	298	1	1	4.01	1.815	0.01	1017	20.085	0	1
2	1	22	75	2.3	0	4.35	0	0	3.78	1.774	0.8	0	26.682	0	1
2	1	24	59	1.08	0	2.52	0	0	3.72	1.508	1.19	0	18.925	0	1
2	1	23	52	2.67	0	1.7	0	0	3.83	1.463	0.5	214	15.491	0	0
2	1	23	52	3.95	0	715.7	1	1	3.72	1.446	0.65	0	12.906	0	0
2	1	24	84	0.93	0	10.37	0	0	0.25	1.541	0.86	0	26.008	0	1
2	1	23	76	0.35	0	2.87	0	0	3.21	1.484	1.03	211	10.916	1	0
2	2	23	61	0.71	0	0.64	0	0	2.89	1.595	1.66	238	8.883	0	0
2	2	22	68	0.95	0	1.7	0	0	2.36	1.658	1.24	0	15.313	0	0
2	1	24	56	4.44	0	0.81	0	0	2.36	1.425	0.95	0	10.689	0	0
2	1	24	53	7.94	0	63.68	1	1	2.35	1.263	1.29	946	16.031	0	0
2	2	22	66	1.05	0	3.29	0	0	2.48	1.476	1.95	1423	12.411	1	0
2	1	21	78	10.98	1	391.9	1	1	0.08	0.974	22.61	214	20.951	0	1
2	1	22	62	1.3	0	45.64	1	1	2.48	1.432	0.89	216	23.711	0	1
2	1	24	59	3.02	0	2.25	0	0	2.39	1.433	1.06	0	13.328	0	0
2	1	22	56	1.96	0	0.52	0	0	2.52	1.488	0.72	0	14.623	1	0
2	1	21	63	1.7	0	1.58	0	0	4.45	1.37	2.59	0	22.781	0	1
2	1	24	40	1.53	0	1.1	0	0	2.78	1.439	1.53	922	7.657	0	0
2	1	24	68	1.35	0	0.15	0	0	2.32	1.534	5.2	212	18.351	0	1
2	1	24	56	1.48	0	23.79	0	0	2.19	1.299	1.55	0	23.588	0	1
2	1	22	49	0.51	0	3.6	0	0	3.15	1.783	0.07	0	10.898	0	0
2	1	25	95	4.26	0	0.91	0	0	2.71	1.666	0.51	213	25.42	1	1
2	1	22	59	5.1	0	3.29	0	0	2.76	1.27	1.36	0	11.009	0	0
2	2	23	86	0.33	0	0.68	0	0	2.69	1.71	0.93	0	33.154	0	1
2	1	24	60	1.39	0	0.58	0	0	2.65	1.57	1.21	0	10.153	0	0
2	1	24	47	1.63	0	0.66	0	0	2.48	1.251	0.93	0	10.886	0	0
2	1	24	77	0.8	0	2.36	0	0	2.55	1.329	0.84	0	20.78	0	1
2	1	22	50	0.38	0	1.34	0	0	2.24	1.418	0.89	0	17.106	0	0
2	1	25	59	1.07	0	0.47	0	0	1.35	1.296	1.17	0	8.581	0	0
2	1	21	44	1.16	0	10.42	0	0	2.6	1.499	0.41	0	11.527	1	0
2	1	23	51	0.51	0	15.02	0	0	3.05	1.58	0.53	0	9.878	0	0
2	1	24	65	8.02	1	7.64	1	1	3.1	1.452	1.11	0	19.342	0	1
2	2	24	76	0.59	0	1.51	0	0	3.8	1.565	2.04	0	16.23	0	0
2	1	23	73	1.88	0	10.37	0	0	3.4	1.577	2.81	0	15.405	0	0
2	1	22	76	0.42	0	6.19	0	0	3.54	1.095	3.03	0	11.703	0	0
2	1	25	67	0.84	0	6.38	0	0	2.16	1.498	1.58	1459	11.665	0	0
2	1	21	46	0.55	0	1.86	0	0	2.27	1.569	1.3	0	20.032	0	1
2	1	22	83	1	0	4.71	0	0	1.92	1.445	0.69	0	12.854	0	0
2	1	24	50	0.71	0	5.15	0	0	3.08	1.661	2.09	0	7.641	0	0
2	1	22	101	2.24	0	5.59	0	0	3.17	1.234	0.92	0	19.72	1	1
2	1	21	62	0.13	0	3.9	0	0	3.08	1.481	2.3	0	8.097	0	0
2	1	23	69	5.61	0	311.5	1	1	2.67	1.327	1.23	0	10.2	0	0
2	1	25	92	0.8	0	1.37	0	0	3.66	1.364	0.59	0	25.446	1	1
2	2	21	85	0.63	0	0.88	0	0	3.08	1.726	1.82	0	14.59	0	0
2	1	22	71	0.91	0	2.68	0	0	3.52	1.213	1.56	0	19.003	0	1
2	1	23	70	1.49	0	5.4	0	0	3.4	1.629	0.24	0	13.589	0	0
2	1	23	55	1.35	0	7.54	1	1	2.93	1.14	1.21	0	13.425	0	0
2	1	21	50	101.7	1	282.7	1	1	2.93	1.56	2.05	0	18.521	0	1
2	1	21	51	3.52	0	24.86	0	0	3.17	1.627	0.6	0	17.733	0	0
2	1	24	60	2.82	0	4.34	0	0	2.82	1.458	0.46	0	12.215	0	0
2	1	23	59	83.37	1	2.89	0	1	4.75	1.766	0.05	0	18.738	0	1
2	1	25	75	3.23	0	7.26	1	1	2.25	1.245	0.82	0	15.933	0	0
2	1	21	52	3.16	0	95.24	1	1	3.43	1.281	1.98	0	13.998	0	0
2	1	21	53	1.88	0	8.34	0	0	2.46	1.176	3.23	0	10.032	0	0
2	2	23	91	7.23	0	10.62	0	0	3.46	1.371	5.72	0	15.097	0	0
2	1	23	54	0.74	0	5.3	0	0	3.69	1.548	1.25	0	13.021	0	0
2	1	24	61	1.13	0	5.16	0	0	2.54	1.095	0.49	0	20.731	0	1
2	2	23	55	0.08	0	0.89	0	0	2.23	1.151	1.3	0	18.279	0	0
2	1	25	68	0.89	0	2.24	0	0	2.91	1.303	1.47	1404	22.877	0	1
2	2	22	68	2.5	0	1.21	0	0	3.02	1.733	2.12	0	19.279	0	0
2	2	23	62	1.45	0	1.57	0	0	2.73	1.243	1.64	1561	18.988	0	0
2	1	23	64	0.45	0	7.41	1	1	3.6	1.589	0.7	0	17.529	0	0
2	2	25	83	1.7	0	8.9	0	0	3.66	1.579	1.15	0	13.662	0	0
2	2	25	57	2.09	0	2.74	0	0	3.81	1.485	5.25	0	11.151	0	0
2	2	23	93	0.5	0	3.15	0	0	3.67	1.355	0.6	0	27.041	0	1
2	1	22	43	1.8	0	7.91	1	1	3.79	1.876	1.25	0	7.251	0	0
2	1	25	51	0.66	0	0.58	0	0	3.5	1.152	0.81	5836	11.476	0	0
2	1	24	53	1.19	0	0.1	0	0	2.73	1.45	0.91	965	11.704	0	0
2	1	25	55	1.9	0	4.94	0	0	3.06	1.567	0.67	1234	12.571	0	0
2	1	24	56	0.44	0	0.74	0	0	2.74	1.166	2.55	0	16.72	0	0
2	1	25	69	0.27	0	118	1	1	1.89	0.969	2.53	0	12.329	0	0
2	1	25	105	8.15	1	5.15	0	1	3.38	1.29	2.08	0	17.666	1	0
2	2	21	66	1	0	1.07	0	0	3.12	1.334	2.45	10518	14.765	0	0
2	1	24	60	1.6	0	0.86	0	0	3.63	1.126	0.7	2605	21.032	0	1
2	1	24	64	0.21	0	0.17	0	0	3.4	1.104	1.41	1263	32.734	0	1
2	1	21	54	1.1	0	2.57	0	0	2.89	1.17	1.19	0	11.036	0	0
2	1	25	41	1.29	0	50.44	1	1	3.39	1.345	2.06	0	12.091	0	0
2	2	21	92	0.09	0	5.5	0	0	3.08	1.282	2.11	0	26.998	0	1
2	1	21	77	7.8	0	0.33	0	0	2.42	1.418	5.12	0	7.852	0	0
2	1	23	90	2.39	0	2.49	0	0	3.47	1.297	0.79	0	18.61	0	1
2	1	23	51	1.85	0	4.01	0	0	3.67	1.298	2.02	0	12.923	0	0
2	1	24	81	18.23	1	2.57	0	0	3.3	1.299	1.56	1992	21.635	0	1
2	2	23	77	0.13	0	3.69	0	0	3.19	1.408	1.06	0	22.348	0	0
2	1	22	44	0.61	0	0.29	0	0	3.6	1.364	1.08	0	12.18	0	0
2	1	22	51	1.46	0	0.84	0	0	3.39	1.242	1.7	0	11.205	0	0
2	1	24	77	0.26	0	1.73	0	0	2.72	1.106	1.2	0	21.478	0	1
2	1	25	75	0.42	0	1.11	0	0	2.57	1.295	0.8	0	15.245	0	0
2	1	24	64	0.92	0	0.19	0	0	2.98	1.388	0.87	0	11.41	0	0
2	1	23	53	4.9	0	0.17	0	0	3.47	1.494	0.62	0	16.821	0	0
2	1	22	52	1.19	0	0.45	0	0	6.94	1.432	0.91	0	12.14	0	0
2	2	24	89	0.89	0	2.1	0	0	4.85	1.423	3.06	0	30.804	0	1
2	1	21	44	1.3	0	0.47	0	0	2.76	1.687	1.06	779	11.587	0	0
2	1	23	59	45.88	1	1.78	0	1	2.86	1.228	1.17	0	15.578	0	0
2	1	25	47	3.53	0	0.1	0	0	3.26	1.198	1.18	0	16.683	1	0
2	1	24	46	0.27	0	0.74	0	0	3.48	1.337	0.71	849	11.534	1	0
2	2	22	69	0.51	0	0.12	0	0	4.99	1.511	0.02	0	16.691	0	0
2	1	21	58	0.69	0	1.01	0	0	2.89	1.321	1.02	0	19.965	0	1
2	1	21	58	0.11	0	0.35	0	0	3.54	1.589	1.92	914	21.804	0	1
2	1	24	45	0.8	0	5.14	0	0	3.24	1.275	2.76	0	10.645	0	0
2	1	24	57	19.6	1	1.8	0	1	3.25	1.354	5.45	0	13.657	0	0
2	1	21	70	1.02	0	0.56	0	0	2.94	1.088	2.68	0	12.377	0	0
2	1	22	52	4.52	0	16.32	0	0	3.7	1.448	1.99	0	8.672	0	0
2	1	24	75	0.25	0	0.17	0	0	3.74	1.463	0.52	0	19.382	0	1
2	1	25	73	0.02	0	0.19	0	0	3.11	1.5	1.45	0	14.799	0	0
2	1	22	54	0.22	0	1.41	0	0	3.29	1.36	0.51	0	18.736	0	1
2	1	22	95	10.35	1	432.2	1	1	3.32	1.228	1.52	0	30.816	0	1
2	1	25	65	7.77	0	516.7	1	1	2.93	0.826	4.01	0	20.032	0	1
2	2	23	65	1.28	0	1.62	0	0	3.97	1.727	1.22	0	23.968	0	0
2	2	23	73	0.45	0	9.69	0	0	3.19	1.65	0.58	0	18.71	0	0
2	1	25	61	1.01	0	2.57	0	0	3.42	1.441	0.3	3353	20.626	0	1
2	1	23	58	7.56	0	18.77	0	0	2.45	1.42	1.54	0	11.424	0	0
2	1	24	98	0.93	0	2.68	0	0	2.88	1.141	1.36	0	23.763	0	1
2	1	24	58	0.36	0	0.72	0	0	2.58	1.196	2.33	0	14.649	0	0
2	1	24	49	0.53	0	1.42	0	0	2.3	1.452	1.4	0	11.389	0	0
2	1	25	57	2.41	0	3.28	0	0	2.5	1.275	1.09	1554	5.558	0	0
2	1	22	57	1.02	0	1.33	0	0	2.99	1.481	1.8	0	13.46	0	0
2	1	22	58	1.37	0	0.39	0	0	2.45	1.441	0.46	0	17.414	0	0
2	2	24	65	1.03	0	3.12	0	0	3.25	1.635	2.69	1688	12.868	0	0
2	2	24	87	3.16	0	2.7	0	0	2.19	1.517	1.72	0	13.573	0	0
2	1	23	77	0.82	0	1.84	0	0	2.76	1.391	0.53	1415	16.908	0	0
2	2	22	70	0.42	0	3.52	0	0	2.65	1.871	2.25	1826	11.088	0	0
2	1	25	50	0.45	0	1.26	0	0	2.51	1.446	1.79	0	9.586	0	0
2	1	24	51	1.09	0	1.23	0	0	2.75	1.293	1.8	0	14.459	0	0
2	2	22	70	19.63	1	71.21	1	1	2.83	1.383	4.04	0	18.56	0	0
2	1	25	64	2.91	0	1.59	0	0	2.94	1.146	0.71	0	24.132	0	1
2	1	23	53	0.33	0	2.02	0	0	0.85	0.8	0.96	0	18.684	0	1
2	1	23	82	0.6	0	6.33	0	0	2.74	1.298	1.19	0	15.53	0	0
2	2	25	82	0.47	0	1.6	0	0	2.56	1.487	1.75	0	18.193	0	0
2	2	23	62	0.44	0	0.77	0	0	2.76	1.567	0.76	0	12.937	0	0
2	1	24	46	3.2	0	2.39	0	0	2.03	1.671	1.98	0	19.035	0	1
2	1	23	41	0.49	0	14.19	0	0	4.14	1.498	1.32	0	12.076	1	0
2	2	22	88	0.52	0	4.38	0	0	3	1.582	1.98	0	10.086	0	0
2	2	24	68	2.47	0	9.09	0	0	3.03	1.362	2.07	0	17.599	0	0
2	1	23	79	0.48	0	2.54	0	0	2.15	1.367	2.51	0	8.963	0	0
2	2	25	66	0.81	0	1.22	0	0	2.71	1.66	1.34	0	18.417	0	0
2	2	23	77	1.05	0	0.81	0	0	3.1	1.59	1.76	0	10.231	0	0
2	2	24	61	0.77	0	2.1	0	0	2.65	1.495	0.45	0	23.203	0	0
2	1	24	50	0.79	0	1.72	0	0	2.4	1.546	1.24	0	18.02	0	1
2	1	22	87	0.29	0	0.14	0	0	2.68	1.521	0.62	3463	17.742	0	0
2	1	22	78	11.38	1	238.7	1	1	2.67	1.716	1.44	0	21.919	1	1
2	2	24	91	4.18	0	16.25	0	0	3.21	1.9	0.53	0	29.614	0	1
2	1	25	52	2.34	0	37.61	1	1	4	1.843	1.02	1386	11.631	1	0
2	1	23	65	10.06	1	2.65	0	0	3.91	1.661	1.59	0	9.952	0	0
2	1	24	56	0.92	0	172.4	1	1	2.3	1.546	2.37	0	17.859	0	0
2	2	26	70	2.01	0	0.1	0	0	3.53	1.707	1.16	0	15.807	0	0
2	2	24	68	1.92	0	5.58	0	0	2.81	1.548	1.14	0	14.313	0	0
2	2	23	70	0.18	0	1.35	0	0	3.61	1.282	1.45	0	13.778	0	0
2	1	23	51	0.67	0	3.6	0	0	3.41	1.373	0.96	0	8.335	0	0
2	2	21	66	0.9	0	2.07	0	0	3.45	1.625	0.49	0	11.186	0	0
2	1	24	82	0.75	0	0.28	0	0	3.24	1.459	1.68	0	20.983	0	1
2	2	23	74	1.56	0	6.27	0	0	4.2	1.529	0.98	0	23.615	0	0
2	2	24	72	1.79	0	6.14	0	0	3.39	1.621	1.33	0	16.468	0	0
2	1	24	50	2.09	0	3.04	0	0	3.74	1.685	1.05	0	11.381	0	0
2	2	21	58	0.64	0	0.08	0	0	3.3	1.48	0.74	0	5.007	0	0
2	1	24	70	0.71	0	5.23	0	0	3.99	1.505	0.77	0	12.511	0	0
2	1	22	56	3.83	0	106.1	1	1	2.54	1.178	0.95	0	17.206	0	0
2	2	21	55	1.07	0	5.1	0	0	3.2	1.345	1.66	0	16.319	0	0
2	2	24	68	0.4	0	5.9	0	0	3.46	1.311	1.25	0	15.652	0	0
2	2	21	69	1.72	0	1.73	0	0	3.28	1.424	1.35	0	17.096	0	0
2	1	24	56	6.82	0	594.3	1	1	3.01	1.37	1.3	0	15.28	0	0
2	1	21	58	10.62	1	383.5	1	1	3.26	1.176	2	0	20.067	0	1
2	2	25	76	1.91	0	17.05	0	0	3.64	1.75	1	0	18.899	0	0
2	1	22	51	0.85	0	6.85	0	0	3.16	1.549	0.64	1837	17.607	0	0
2	1	21	94	1.73	0	6.23	0	0	3.66	1.436	1.07	0	22.613	1	1
2	2	26	78	1.74	0	2.47	0	0	3.81	1.349	1.37	0	17.993	0	0
2	2	22	62	0.69	0	1.38	0	0	3.28	1.572	0.79	0	12.42	0	0
2	1	21	57	1.48	0	1.25	0	0	2.75	1.597	1.2	0	9.685	0	0
2	1	24	61	7.67	0	8.9	0	0	3.35	1.552	0.97	0	13.808	0	0
2	1	21	57	22.21	1	599.9	1	1	3.37	1.344	3.38	0	27.241	0	1
2	1	24	65	3.09	0	8.38	0	0	3.51	1.671	2.97	0	14.315	0	0
2	1	25	68	0.66	0	5.07	0	0	2.8	1.17	2.85	0	8.651	0	0
2	1	24	67	3.05	0	5.21	0	0	3.48	1.734	2.56	1418	8.773	0	0
2	1	23	71	0.94	0	3.55	0	0	2.18	1.542	1.51	0	10.472	0	0
2	1	24	57	2.7	0	1.08	0	0	3.26	1.334	0.58	0	18.436	0	1
2	1	23	70	7.28	0	36.74	1	1	2.79	1.503	0.09	0	12.799	0	0
2	1	23	70	2.27	0	4.65	0	0	2.71	1.281	0.85	0	21.948	0	1
2	1	23	67	1.57	0	2.12	0	0	3.09	1.165	0.42	0	16.661	0	0
2	1	26	65	19.96	1	434.42	1	1	2.6	1.391	4.25	0	13.249	0	0
2	1	23	60	5.94	0	7.51	1	1	2.39	1.346	0.71	0	19.631	0	1
2	1	22	83	11.64	1	12.68	0	1	3.29	1.481	2.4	0	16.037	0	0
2	1	24	55	1.37	0	1.59	0	0	2.97	1.398	0.97	0	20.157	1	1
2	1	21	71	0.53	0	1.15	0	0	3.21	1.089	2.47	1181	19.876	0	1
2	1	23	48	0.92	0	6.62	0	0	3.35	1.454	1.48	0	12.454	0	0
2	1	26	60	43.42	1	356.6	1	1	3.18	1.412	2.28	0	15.317	0	0
2	1	24	64	7.86	0	4.95	0	0	3.03	1.514	2.95	0	15.54	0	0
2	1	21	53	1.17	0	2.16	0	0	3.26	1.371	1.22	0	17.172	0	0
2	1	25	63	1.4	0	4.92	0	0	2.66	1.129	0.49	1376	14.987	0	0
2	1	23	53	1.45	0	29.5	0	0	2.38	1.064	0.84	1064	11.513	0	0
2	1	25	58	1.11	0	6.75	0	0	2.5	1.168	0.99	0	17.434	0	0
